# Supplementary material
Source: publisher figshare collection journal article supplement (https://gsapubs.figshare.com/ndownloader/files/24624842)
Supplement: Supplementary file 1 [file 24624842]

## Supplementary Materials for

### Paleomagnetic constraints on the duration of the Australia–Laurentia connection in the core of the Nuna supercontinent

*Uwe Kirscher, Ross N. Mitchell, Yebo Liu, Adam R. Nordsvan, Grant M. Cox, Sergei A. Pisarevsky, Chong Wang, Lei Wu, J. Brendan Murphy, and Zheng-Xiang Li*

#### **This PDF file includes:**

Supplementary methods

Figures S1 to S5

Tables S1 to S7

#### **SUPPLEMENTARY TEXT**

##### **Sampling details of Derim Derim sill outcrops**

No contact with the Roper Group strata was visible in any sampled outcrop. Accordingly, the stratigraphic positions of the sampled sills were based on the most recent geological map (Abbott et al., 2001), which suggests that the sampled Derim Derim sills intruded the Jalobi Formation (sites DD1), the Sherwin Formation (DD2), the Kyalla Formation (DD3, 4, 5, 13), the Hodgson Sandstone and Corcoran Formation (DD9) and the Crawford Formation (DD10, 11, 12).

##### **Detailed paleomagnetic and rock magnetic methods**

Block samples were oriented with both magnetic and sun compasses. Sun-compass observations were made whenever possible to ensure an accurate measure of the local magnetic declination. From the six to eight oriented block samples from each site, inch-diameter cores were drilled in the laboratory and cut in standard sized cylinders. Magnetizations were measured with a 2G-Enterprises DC SQUID magnetometer with background noise sensitivity of  $\sim 5 \times 10^{-12}$  Am<sup>2</sup> per axis at Curtin University. The magnetometer is equipped with computer controlled, online alternating-field demagnetization coils and an automated vacuum pick-and-put sample-changing array (Kirschvink et al., 2008). Samples and instruments are housed in a magnetically shielded room with residual fields less than 500 nT throughout the demagnetization procedures.

To obtain information on the magnetic carriers three rock magnetic experiments were conducted: a composite 3-axis isothermal remanent magnetization was thermally demagnetized (Lowrie, 1990), additionally susceptibility vs temperature curves, and magnetic hysteresis loops were obtained. Susceptibility vs temperature curves were obtained using an AGICO MFK1-FA Kappabridge in both argon and air atmospheres; magnetic hysteresis loops were obtained using a variable field translation balance.

All samples were subjected to 15 minutes of low-temperature cleaning in a liquid nitrogen bath to remove potential contamination of “soft” magnetic components carried by multi-

domain magnetite (Schmidt, 1993). Thermal demagnetization proceeded in steps of 10–50 °C up to 600 °C (or until thoroughly demagnetized or unstable, for an average of 20 steps per specimen) in a magnetically shielded ASC furnace ( $\pm 2$  °C error). AF demagnetization proceeded in steps of 5–20 mT up to 110 mT (or until thoroughly demagnetized or unstable, for an average of 20 steps per specimen). Magnetic components were computed for each sample using principal-component analysis (Kirschvink, 1980) as implemented in Paleomag OS X (Jones, 2002). All vectors were calculated using at least four successive steps with a maximum angular deviation (MAD)  $< 10^\circ$ . In instances where stable-endpoints could not be reached, remagnetization great circles were fitted. Site-mean directions and mean virtual geomagnetic poles (VGPs) were calculated using Fisher statistics (Fisher, 1953) or the iterative approach combining great circles and magnetic vectors (McFadden & McElhinny, 1988). All calculations were carried out using the PmagPy package (Tauxe et al., 2016). GPlates software (Boyden et al., 2011) was used for paleogeographic reconstruction.

Nearly all samples carry a low-temperature/low-coercivity component typically stable up to 300°C (occasionally 550°C) and 20 mT, respectively (Fig. 1). This low-stability component of the Derim Derim samples yields a mean direction indistinguishable from that of the present-day magnetic field for this region and is therefore explained by a recent overprint (Fig. S4). Great circles were only added to calculate mean ChRM directions of two of the 12 sites (Table S3, Fig. S4). Both sedimentary sites from drill core sampled for a baked contact test exhibit stable demagnetization behavior (Fig. S4)).

### **Reversal Test**

We carried out a set of tests to see if the directions might reveal a positive reversal test. This has proved to be slightly problematic because only one site shows a reversed polarity. The reversal test of McFadden and McElhinny (1990) yields an indeterminate result with the angle between the normal polarity mean direction and the reversed mean direction being  $11.7^\circ$ . Nonetheless, after flipping one polarity, the two directions do overlap within uncertainty (Fig. S4). A Watson test also reveals that the directions of the two polarities could have been drawn from the same population. More data is needed for a robust test, but we conclude that the two polarities can be interpreted as being representative of the presence of a geomagnetic field reversal.

### **Secular Variation**

Combining the site mean direction to an overall mean direction yields a secular variation value of  $S=21.51$ . A recent compilation of high-quality data (Veikkolainen and Pesonen, 2014) suggests  $S$  values in the Precambrian in the range of 5–15 for a paleolatitude of  $\sim 25^\circ$ . The value for the Derim Derim sills is elevated but not unreasonably so. Also, the Deenen criteria (Deenen et al., 2011) shows a value within the expected range of secular variations. Both these aspects do suggest that secular variation has been sufficiently averaged out, but large uncertainties remain related to the extent of secular variation expected in the Mesoproterozoic.

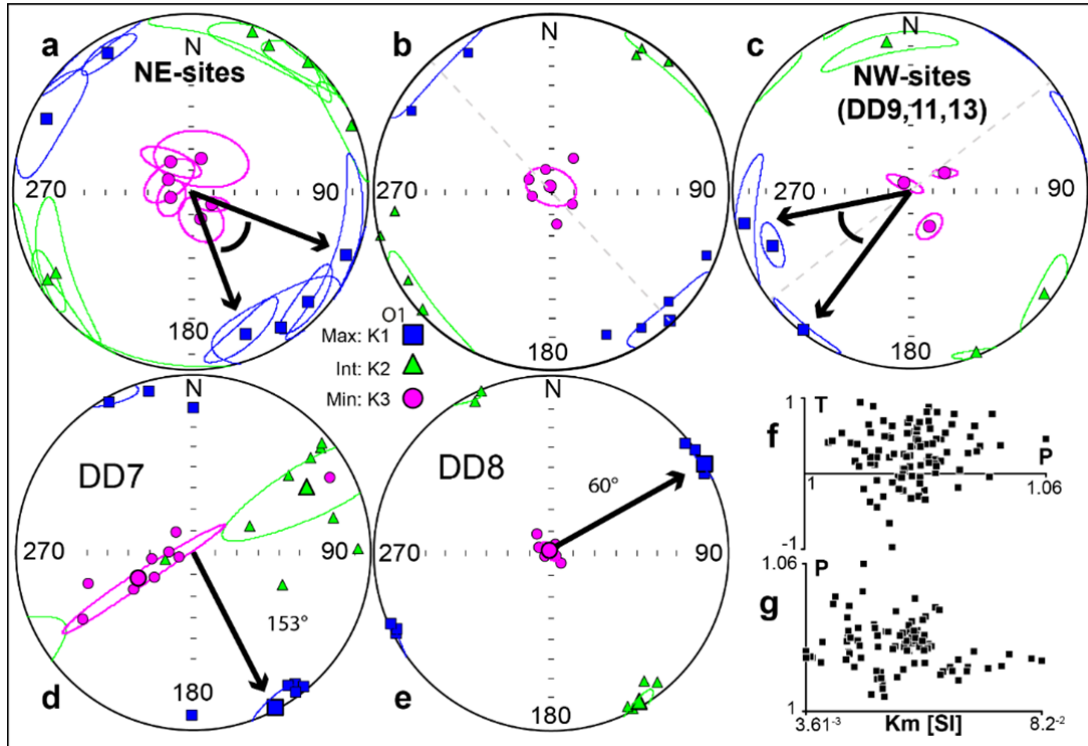

Figure S1. Results of anisotropy of magnetic susceptibility (AMS). (a) Mean anisotropy of magnetic susceptibility tensor of Derim Derim sill sites with a south-easterly lineation direction (DD2, 4, 5, 10, 12) with according confidence ellipses. (b) Mean directions of sites of (a) with the overall mean tensor of these sites. (c) Mean tensor of site with south-westerly lineation direction (DD9, 11, 13). Black arrows indicate variation of lineation direction within these sites. (d+e) AMS results with mean tensor of both drill core sites. (f+g) Plots of degree of anisotropy (P) versus mean susceptibility (Km) and shape parameter (T) versus P for all measured samples.

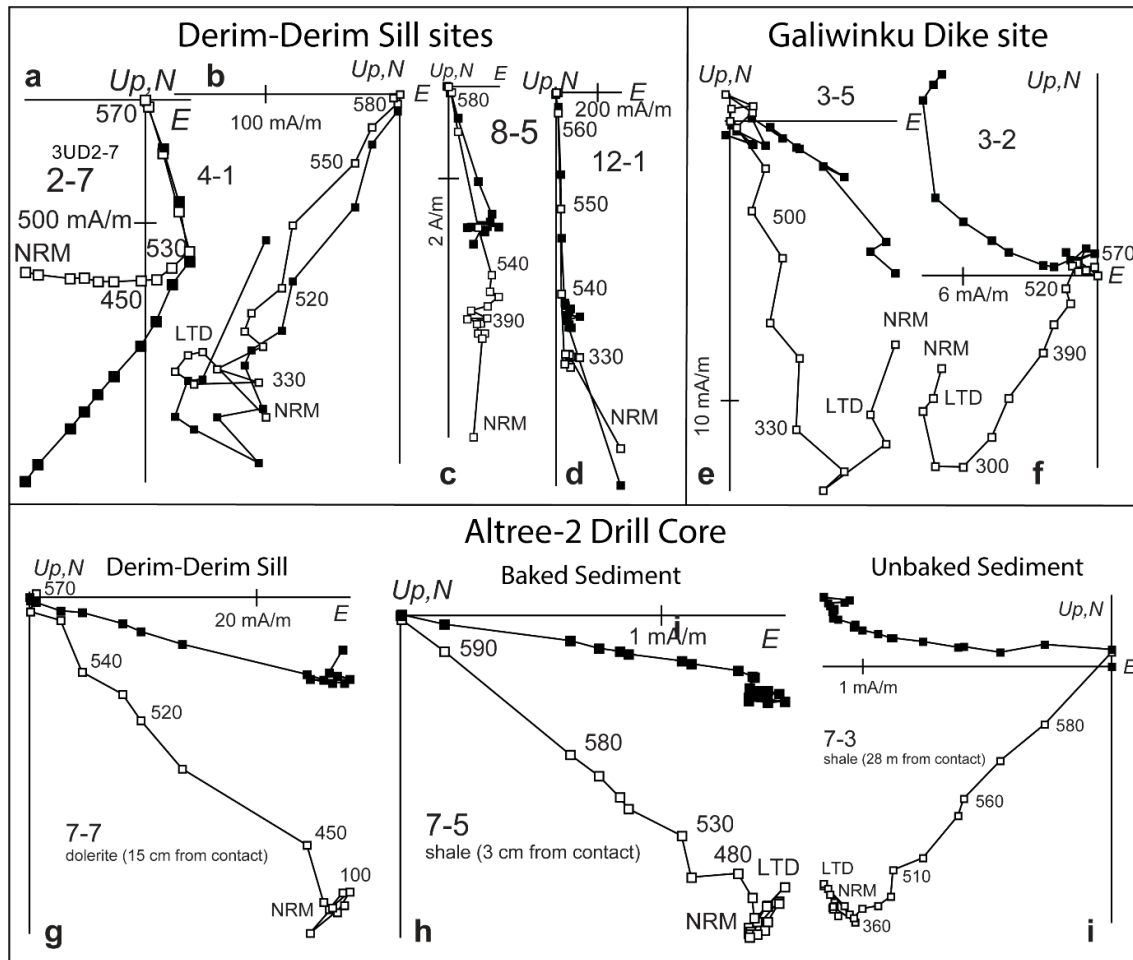

Figure S2. Representative demagnetization plots in orthogonal vector endpoint diagrams (Zijderveld, 1967). Open/filled symbols indicate projections on the horizontal/vertical planes. Demagnetization steps are given in °C, if not otherwise indicated. (a-d+g) represent Derim Derim sill samples, (e+f) Galiwinku dyke samples, (g-i) contact sediments and Derim Derim sill samples from the Atree-2 drill core. LTD refers to an initial low temperature step in liquid nitrogen.

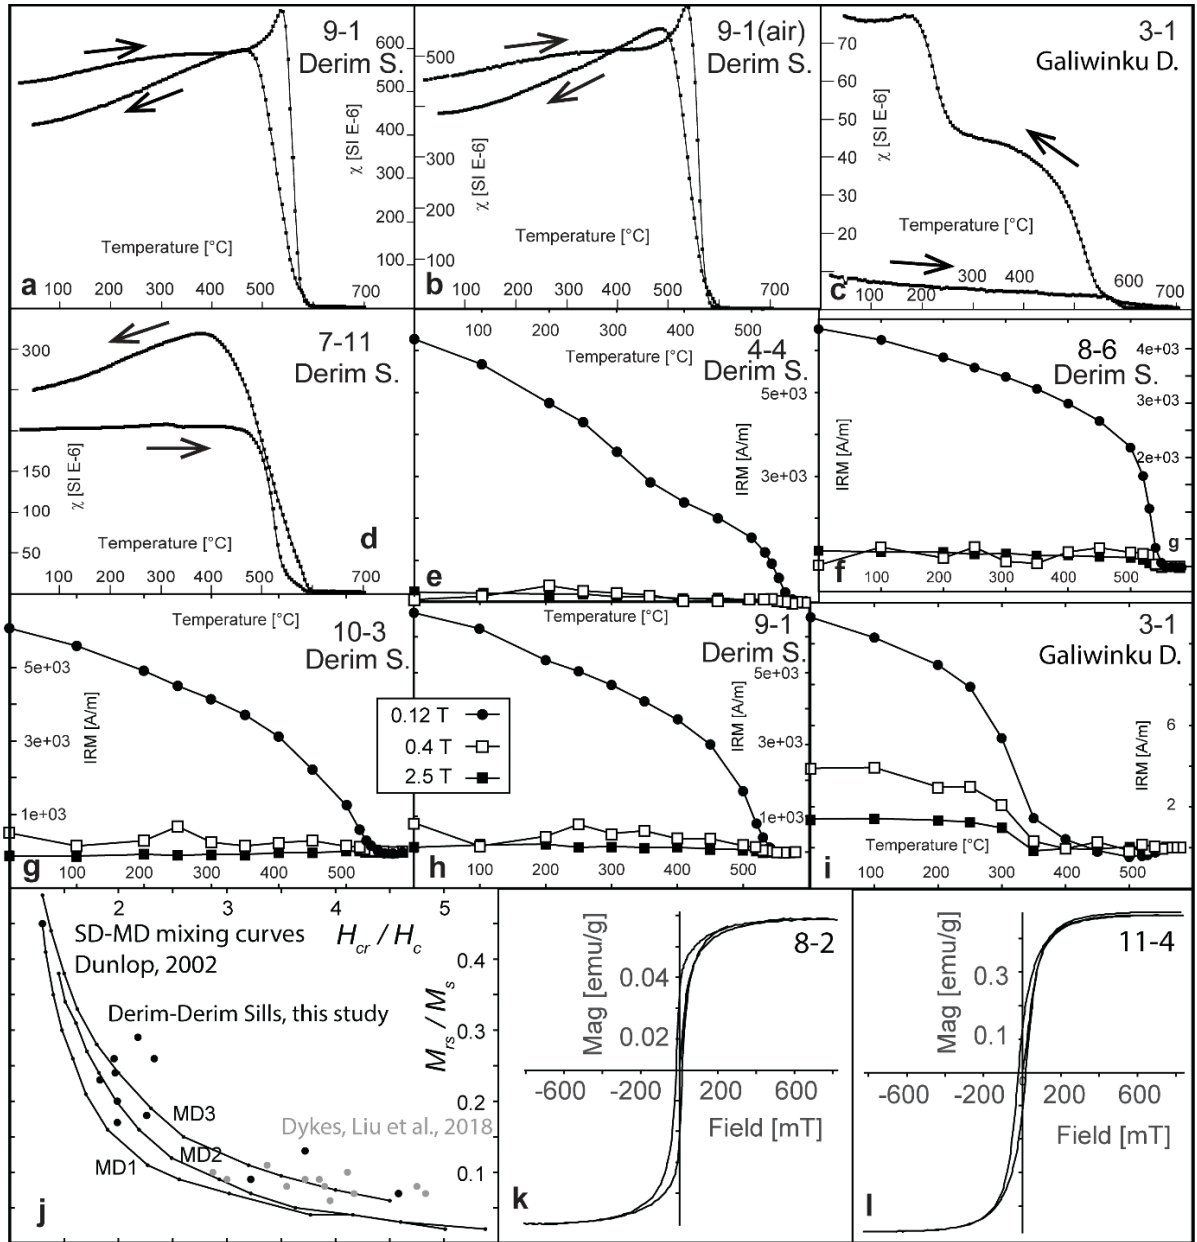

Figure S3. Representative rock magnetic results. (a-d) Susceptibility versus temperature curves; (e-i) Progressive thermal demagnetization of three-axis composite IRMs, (j-l) magnetic hysteresis loops.

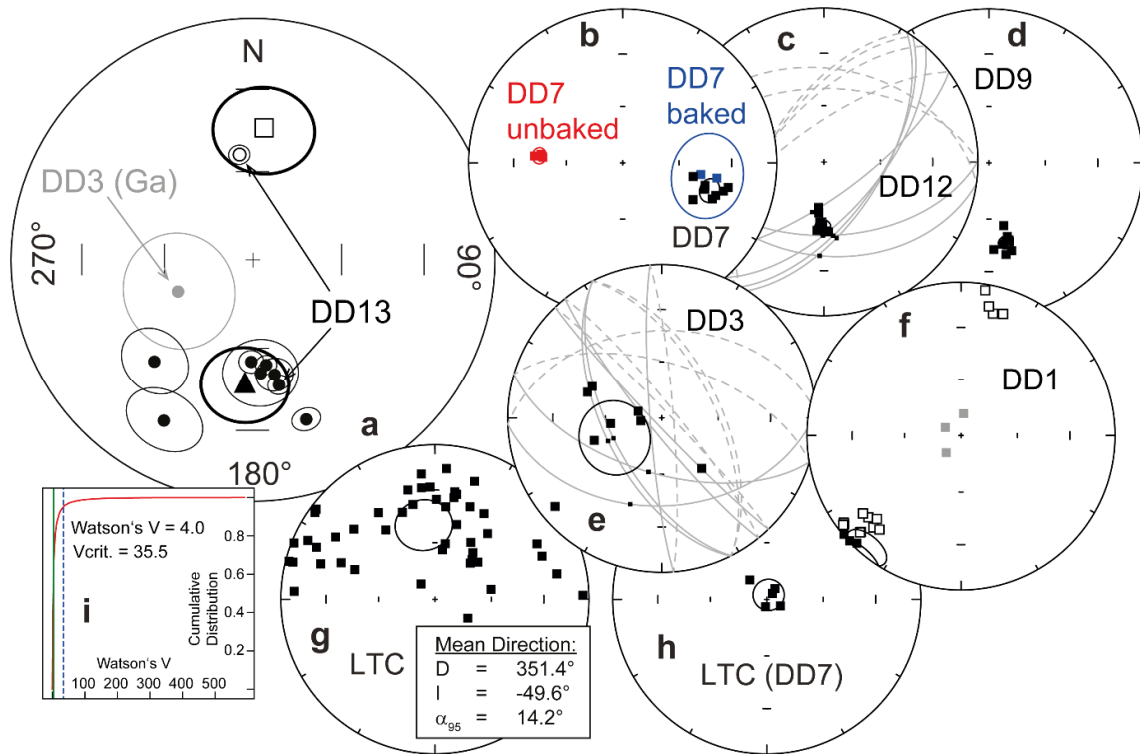

Figure S4. Equal-area stereonet showing (a) the site-mean directions of ChRM of the Derim Derim sill sites and the Galiwinku dyke site (Ga, DD3). Reversed polarity site DD13 is shown in its original (open circle) and flipped (filled circle) orientation. Filled triangle is overall mean of the Derim Derim sill sites including DD13, and the open square represents the mirrored normal polarity mean direction, showing the overlap between the normal polarity sites and reverse polarity site DD13. (b) All directions of drill core site DD7 including the baked contact test; (c-f) Sample and site mean directions with site mean error intervals of sites DD1, 3, 9, 12. (g-h) LTC of Derim Derim sill outcrop sites (g) and drill core site DD7 (h). (h) A steep overprint direction likely representing a drilling-induced remanence. Filled symbols indicate lower hemisphere directions. (i) Watson's test of common mean on Derim Derim sill mean directions with normal and reverse polarities (see supplementary text for more explanation).

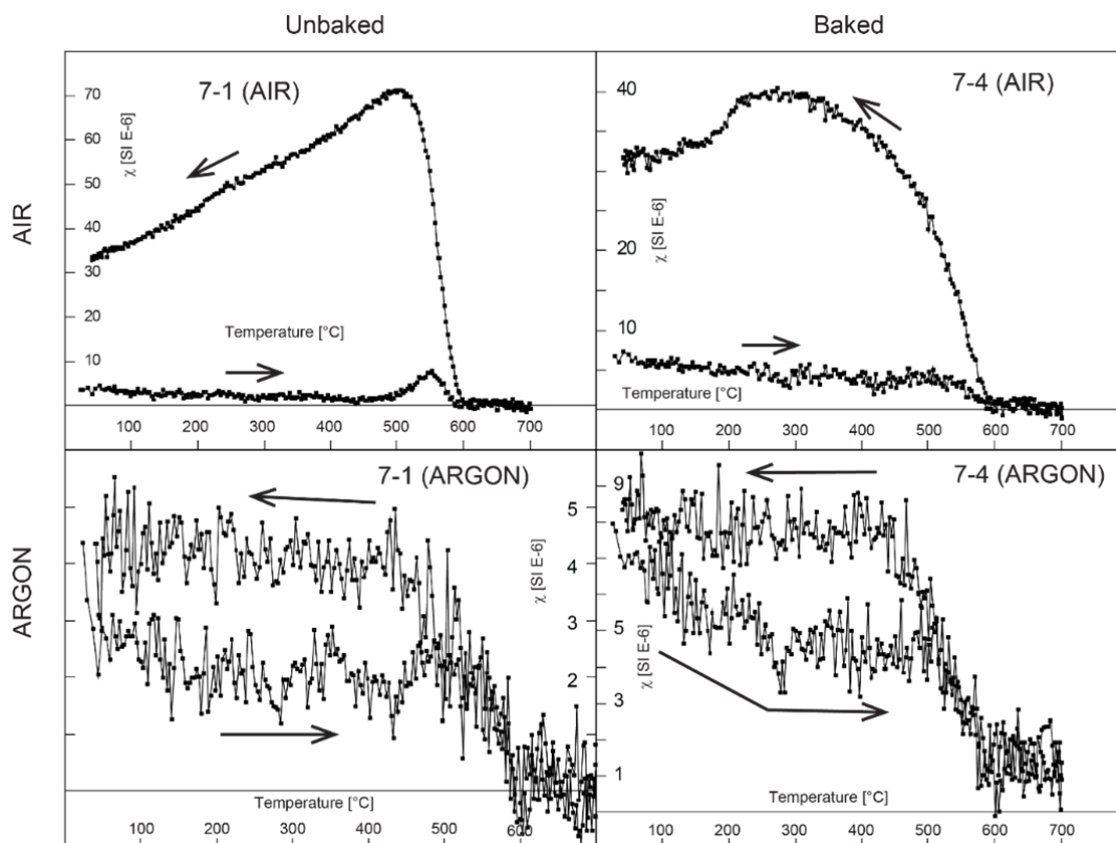

Figure S5. Susceptibility versus temperature curves of baked and unbaked sediment overlying Derim Derim sills from the Aلتree-2 drill core. Experiments were performed in air and argon atmospheres. Sample 7-1 is from ca. 30 m above the contact to the sills, whereas 7-4 is ca. 10 cm from above the contact (see main text for further explanation). Heating and subsequent cooling cycles are shown indicated by black arrows.

**Table S1. GPS coordinates of the sampling sites and drill cores.**

| Site DD- | Latitude | Longitude | Sampling environment                    |
|----------|----------|-----------|-----------------------------------------|
| 1        | -14.708  | 134.443   | Derim Derim Sill outcrop                |
| 2        | -14.705  | 134.296   | Derim Derim Sill outcrop                |
| 3        | -14.736  | 134.259   | Galiwinku Dike outcrop                  |
| 4        | -14.760  | 134.212   | Derim Derim Sill outcrop                |
| 5        | -14.819  | 134.131   | Derim Derim Sill outcrop                |
| 7        | -15.924  | 133.787   | Derim Derim Sill drill core (Altree-2)  |
| 8        | -15.632  | 132.826   | Derim Derim Sill drill core (Tarlee-S3) |
| 9        | -14.252  | 133.663   | Derim Derim Sill outcrop                |
| 10       | -14.121  | 133.889   | Derim Derim Sill outcrop                |
| 11       | -14.074  | 134.035   | Derim Derim Sill outcrop                |
| 12       | -14.186  | 133.804   | Derim Derim Sill outcrop                |
| 13       | -14.928  | 134.033   | Derim Derim Sill outcrop                |



**Table S2. AMS results of the Derim Derim sills and Galiwinku dyke (DD3).**

| Site | N  | Kmean<br>[SI] | Max     |         |            | Int     |         |            | Min     |         |            | Average |       |        |        |
|------|----|---------------|---------|---------|------------|---------|---------|------------|---------|---------|------------|---------|-------|--------|--------|
|      |    |               | Dec [°] | Inc [°] | Conf.angle | Dec [°] | Inc [°] | Conf.angle | Dec [°] | Inc [°] | Conf.angle | Lmean   | Fmean | Pjmean | Tmean  |
| DD1  | 10 | 5.37E-02      | 165.3   | 10.6    | 8.4/2.2    | 255.3   | 0.4     | 9.5/7.3    | 347.4   | 79.4    | 8.5/2.2    | 1.007   | 1.009 | 1.016  | 0.075  |
| DD2  | 6  | 2.54E-02      | 132.9   | 11.1    | 15.2/7     | 42.3    | 2.8     | 18.1/8     | 298.5   | 78.6    | 13.3/7.1   | 1.01    | 1.028 | 1.04   | 0.479  |
| DD3  | 8  | 1.12E-03      | 178.8   | 61.2    | 40.8/21.3  | 355.3   | 28.7    | 39.3/18.2  | 86.1    | 1.5     | 32/11.4    | 1.001   | 1.002 | 1.003  | 0.304  |
| DD4  | 10 | 1.90E-02      | 300.1   | 9.6     | 14.5/12.2  | 32.1    | 11.2    | 15.8/13.4  | 170.4   | 75.1    | 15.1/11.7  | 1.015   | 1.007 | 1.023  | -0.344 |
| DD5  | 5  | 2.97E-02      | 169.5   | 13.2    | 25.9/11.5  | 262.4   | 12.4    | 25.8/14.5  | 34.3    | 71.7    | 18.8/7.3   | 1.002   | 1.008 | 1.01   | 0.535  |
| DD7  | 10 | 5.66E-03      | 152.5   | 2.1     | 10.9/6.1   | 61.5    | 24      | 41.2/10.9  | 247.3   | 65.9    | 41.4/3.1   | 1.016   | 1.007 | 1.024  | -0.41  |
| DD8  | 6  | 3.30E-02      | 59.8    | 0       | 7/2        | 149.8   | 1.5     | 7.9/3.1    | 328.6   | 88.5    | 5.4/2.6    | 1.017   | 1.029 | 1.048  | 0.253  |
| DD9  | 5  | 4.14E-02      | 248.6   | 17.6    | 8.7/5.4    | 158.1   | 1.7     | 8.7/2.3    | 62.6    | 72.3    | 5.7/2      | 1.005   | 1.03  | 1.038  | 0.687  |
| DD10 | 14 | 4.03E-02      | 123.2   | 5.9     | 26.1/5.8   | 32.6    | 6.4     | 26.1/8.1   | 255.2   | 81.3    | 8.3/5.8    | 1.008   | 1.019 | 1.028  | 0.421  |
| DD11 | 7  | 2.84E-02      | 258.7   | 5.4     | 26.8/5.6   | 350.1   | 14.9    | 26.8/8.4   | 149.3   | 74.1    | 8.7/5.9    | 1.008   | 1.019 | 1.028  | 0.409  |
| DD12 | 17 | 3.92E-02      | 329.1   | 9.6     | 11.6/5.1   | 238.1   | 5.4     | 11.7/6.2   | 119.1   | 79      | 7.6/3.2    | 1.008   | 1.019 | 1.028  | 0.406  |
| DD13 | 7  | 5.94E-03      | 217.5   | 1.9     | 14.5/2.8   | 127.4   | 3.9     | 15.3/7     | 333.8   | 85.7    | 9/2.6      | 1.008   | 1.014 | 1.022  | 0.307  |

N: Number of samples used for calculating mean directions. Max, Int, Min, Dec, Inc, Conf.angle: Maximum, Intermediate and Minimum axis of anisotropy tensor shown by declination and inclination with confidence angle. Ratios of mean magnetic lineation (L), magnetic foliation (F), corrected degree of anisotropy (Pj) and shape parameter (T) are also shown.

**Table S3. Paleomagnetic results of the Derim Derim sills and Antrim Volcanics.**

| Site                                          | N     | Arcs | D [°] | I [°] | k     | $\alpha_{95}$ [°] | Plat [°] | Plong [°] | A <sub>95</sub> [°] |
|-----------------------------------------------|-------|------|-------|-------|-------|-------------------|----------|-----------|---------------------|
| Derim Derim Sills                             |       |      |       |       |       |                   |          |           |                     |
| DD1*                                          | 15/18 | 0    | 220.1 | -5.0  | 15.9  | 9.2               | -48.6    | 57.7      | 6.5                 |
| DD2                                           | 12/12 | 0    | 169.4 | 49.9  | 49.9  | 5.9               | -71.1    | 163.2     | 6.5                 |
| DD-3 <sup>+</sup>                             | 15/13 | 4    | 247.1 | 62.5  | 7.8   | 19.2              | -26.4    | 86.1      | 26.5                |
| DD-4                                          | 14/15 | 0    | 224.0 | 41.0  | 12.8  | 11.1              | -47.6    | 63.1      | 10.5                |
| DD-5                                          | 7/18  | 0    | 208.9 | 24.8  | 28.3  | 11.5              | -61.9    | 44.5      | 9.0                 |
| DD-9                                          | 9/9   | 0    | 168.3 | 46.0  | 194.9 | 3.5               | -73.1    | 172.4     | 3.6                 |
| DD-10                                         | 18/18 | 0    | 161.6 | 30.9  | 66.1  | 4.3               | -72.2    | 214.6     | 3.6                 |
| DD-11                                         | 10/10 | 0    | 176.2 | 51.0  | 15.3  | 12.0              | -72.5    | 144.8     | 13.3                |
| DD-12                                         | 14/14 | 6    | 181.0 | 55.2  | 131.5 | 4.0               | -68.7    | 131.8     | 4.8                 |
| DD-13                                         | 11/11 | 0    | 352.9 | -53.8 | 162.9 | 3.4               | 69.2     | 330.7     | 4.0                 |
| MEAN:                                         | 8     | 0    | 183.6 | 46.2  | 17.3  | 13.7              | -76.5    | 120.2     | 15.0                |
| Derim Derim sills (obtained from drill cores) |       |      |       |       |       |                   |          |           |                     |
| DD-7                                          | 8/8   | 0    | 107.7 | 40.4  | 82.7  | 5.7               |          |           |                     |
| DD-8                                          | 6/6   | 0    | 348.4 | 54.9  | 392.9 | 3.1               |          |           |                     |

N: Number of samples used for calculating site mean directions versus obtained samples per site. Arcs: Number of incorporated great circles used to calculate mean directions (Mcfadden and McElhinny, 1988). Mean direction shown by declination (D), inclination (I) and precision parameter k and 95% confidence interval  $\alpha_{95}$  (Fisher, 1953). Coordinates of palaeopole in (Plat, Plong) and the confidence interval (A<sub>95</sub>). All angles are shown in degrees ([°]). <sup>+</sup>: Site of Galiwinku dyke, not included in the MEAN calculations of the Derim Derim sills. \* Site DD1 was not included in the MEAN calculations due to anomalous results compared to the remaining sites, its reddish color, and non-antipodal directions (Fig. DR4). DD-7 was obtained from the Altree-2 drill core (see main text for details) and DD-8 was obtained from drill core Tarlee-S3 (drilled by Pangaea Resources Pty Ltd. 15°37'56.745''S, 132°49'33.539''E), but, due to missing azimuthal control, only used to verify inclination consistency.

**Table S4. Lithology of Aلتree-2 drill core.**

| Age         | Unit and Subunit          | Height (m)  | Thickness (m) |
|-------------|---------------------------|-------------|---------------|
| Cretaceous  | Undifferentiated          | Surface (0) | 76            |
| Cambrian    | Tindall Limestones        | 73          | 25.5          |
|             | Nutwood Downs Volcanics   | 98.5        | 221           |
|             | Bukalara Sandstone        | 320         | 71.72         |
| Proterozoic | Upper Velkerri Formation  | 391.72      | 280.28        |
|             | Middle Velkerri Formation | 672         | 276.23        |
|             | Lower Velkerri Formation  | 948.25      | 281.42        |
|             | Bessie Creek Sandstones   | 1229.65     | 417.46        |
|             | Corcoran Formation        | 1647.11     | 41.12         |
|             | Derim Derim Sill          | 1688.23     | 11.62+        |

**Table S5. Paleomagnetic poles employed in Figures 2 and 3.**

| #  | Terr  | Rockname                           | Abb. | Plat<br>[°] | Plong<br>[°] | A <sub>95</sub><br>[°] | 1234567 Q | Age<br>Min<br>[Ma] | Age<br>Max<br>[Ma] | REF                                                                                    |
|----|-------|------------------------------------|------|-------------|--------------|------------------------|-----------|--------------------|--------------------|----------------------------------------------------------------------------------------|
| 1  | WAC   | Gnowangerup-Fraser dykes           | GF   | -55.8       | 143.9        | 6.3                    | 1111110 6 | 1202               | 1218               | (Pisarevsky et al., 2014)<br>(Schmidt and Williams, 2011)<br>(Tanaka and Idnurm, 1994) |
| 2  | SAC   | Blue Range beds & Pandurra fm      | BR   | -38.4       | 62.4         | 3.5                    | 0111110 5 | 1300               | 1580               |                                                                                        |
| 3  | NAC   | Mt. Isa Metamorphosed Dykes        | MtI  | -79         | 110.6        | 8.4                    | 1110010 4 | 1500               | 1550               |                                                                                        |
| 4  | SAC   | Gawler Range Volcanics             | GRV  | -60.4       | 50           | 6.2                    | 0110100 3 | 1500               | 1590               | (Chamalaun and Dempsey, 1978)                                                          |
| 5  | NAC   | Balbirini Dolomite, upper part     | Bu   | -52         | 176.1        | 7.5                    | 1110111 6 | 1586               | 1592               | (Idnurm, 2000)                                                                         |
| 6  | NAC   | Balbirini Dolomite, lower part     | Bl   | -66.1       | 177.5        | 5.7                    | 1110111 6 | 1606               | 1617               | (Idnurm, 2000)                                                                         |
| 7  | NAC   | Emmerugga Dolomite                 | Em   | -79.1       | 202.6        | 6.1                    | 1111100 5 | 1635               | 1653               | (Idnurm et al., 1995)                                                                  |
| 8  | NAC   | Tooganinie Formation               | To   | -61         | 186.7        | 6.1                    | 1111111 7 | 1645               | 1651               | (Idnurm et al., 1995)                                                                  |
| 9  | NAC   | Mallapunyah Formation              | Ma   | -35         | 214.3        | 3.1                    | 1111111 7 | 1645               | 1665               | (Idnurm et al., 1995)                                                                  |
| 10 | NAC   | West Branch Volcanics              | WB   | -15.9       | 200.5        | 11.3                   | 1111100 5 | 1705               | 1712               | (Idnurm, 2000)                                                                         |
| 11 | NAC   | Fiery Creek Formation              | FC   | -23.9       | 211.8        | 10.4                   | 1110100 4 | 1706               | 1712               | (Idnurm, 2000)                                                                         |
| 12 | NAC   | Wollogorang Formation              | Wo   | -17.9       | 218.2        | 7.2                    | 1011110 5 | 1723               | 1730               | (Idnurm et al., 1995)                                                                  |
| 13 | NAC   | Peters Creek Volcanics, upper part | PC   | -26         | 221          | 4.8                    | 1111111 7 | 1725               | 1729               | (Idnurm, 2000)                                                                         |
| 14 | NAC   | Hart Dolerite                      | HD   | -5.3        | 181          | 12                     | 1111111 7 | 1791               | 1793               | (Kirscher et al., 2019)                                                                |
| 15 | NCC   | Liaoning and Taihang area          | LT   | 11.3        | 175.8        | 7.6                    | 1111111 7 | 1214               | 1225               | (Ding et al., 2020)                                                                    |
| 16 | NCC   | Licheng LIP                        | LC   | 2.0         | 165.1        | 11.0                   | 1111101 6 | 1231               | 1243               | (Wang et al., 2020)                                                                    |
| 17 | NCC   | Yanliao mafic sills                | Ya   | -5.9        | 179.6        | 3.6                    | 1111101 6 | 1316               | 1330               | (Chen et al., 2013)                                                                    |
| 18 | NCC   | Tieling Fm                         | Ti   | -11.6       | 7.1          | 6.3                    | 1111101 6 | 1416               | 1458               | (Wu, 2005)                                                                             |
| 19 | NCC   | Yangzhuang Fm                      | Ya1  | 17.3        | 214.5        | 5.7                    | 0111111 6 | 1485               | 1560               | (Wu et al., 2005)                                                                      |
| 20 | NCC   | Yangzhuang Fm                      | Ya2  | 2.4         | 190.4        | 11.9                   | 0111111 6 | 1485               | 1560               | (Pei et al., 2006)                                                                     |
| 21 | NCC   | Taihang dykes (Central zone)       | Ta   | 47.9        | 275.2        | 4                      | 1111111 7 | 1766               | 1772               | (Halls et al., 2000)                                                                   |
| 22 | NCC   | Yinshan Dykes                      | Yi   | 32.3        | 248.3        | 2                      | 1111111 7 | 1766               | 1772               | (Halls et al., 2000)                                                                   |
| 23 | NCC   | Xiong'er Gp                        | Xi   | 50          | 272.7        | 4.9                    | 1111111 7 | 1770               | 1790               | (Zhang et al., 2012)                                                                   |
| 24 | L     | Mackenzie dykes grand mean         | Mac  | 4           | 190          | 5                      | 1111101 6 | 1265               | 1269               | (Buchan et al., 2000)                                                                  |
| 25 | L     | Nain Anorthosite                   | NA   | 11.7        | 206.7        | 2.2                    | 1110011 5 | 1290               | 1320               | (Murthy, 1978)                                                                         |
| 26 | L-G   | Victoria Fjord dolerite dykes      | VF   | 10.3        | 231.7        | 4.3                    | 1111101 6 | 1380               | 1384               | (Abrahamsen and Vandervoo, 1987)                                                       |
| 27 | L-G   | Zig-Zag Dal Basalts                | ZZ   | 12          | 242.8        | 3.8                    | 1110101 5 | 1380               | 1384               | (Marcussen and Abrahamsen, 1983)                                                       |
| 28 | L     | St. Francois Mountains             | StF  | -13.2       | 219          | 6.1                    | 1111101 6 | 1460               | 1492               | (Meert and Stuckey, 2002)                                                              |
| 29 | L     | Western Channel Diabase            | WC   | 9           | 245          | 6.6                    | 1101101 5 | 1587               | 1593               | (Irving et al., 1972)                                                                  |
| 30 | L-G   | Melville Bugt diabase dykes        | MB   | 5           | 273.8        | 8.7                    | 1110111 6 | 1628               | 1638               | (Halls et al., 2011)                                                                   |
| 31 | L     | Cleaver Dykes                      | CD   | 19.4        | 276.7        | 6.1                    | 1111101 6 | 1736               | 1745               | (Irving et al., 2004)                                                                  |
| 32 | L-T-H | Deschambault Pegmatites            | DP   | 67.5        | 276          | 7.7                    | 1110101 5 | 1761               | 1771               | (Symons et al., 2000)                                                                  |
| 33 | L     | Dubawnt Group                      | Du   | 7           | 277          | 8                      | 1111110 6 | 1750               | 1820               | (Park et al., 1973)                                                                    |
| 34 | L-R   | Martin Formation                   | Ma   | -9          | 288          | 8.5                    | 1101110 5 | 1814               | 1822               | (Evans and Bingham, 1973)                                                              |
| 35 | L-R   | Sparrow Dykes                      | SD   | 12          | 291          | 7.9                    | 1110110 5 | 1823               | 1827               | (Mcglynn et al., 1974)                                                                 |

Terr: Terrane: NAC (North Australia Craton), SAC (South Australia Craton), WAC (West Australia Craton), NCC (North China Craton), L (Laurentia), L-T-H (Laurentia-Trans-Hudson), L-R (Laurentia-Rae), L-G (Laurentia-Greenland). Rockname: Rock Formation/Group. Abb.: Abbreviation. Plat, Plong, A<sub>95</sub>: Paleopole with according confidence interval (Fisher, 1953). 1234567 Q: Quality factors (Van der Voo, 1990). Age Min/Max: Age with uncertainty. REF: Respective reference.

**Table S6. Large igneous provinces used in Figure 3.**

| Color  | Age [Ga] | Number | LIP                                                |
|--------|----------|--------|----------------------------------------------------|
| Pink   | Ca. 1.6  | 1      | Gawler Range Volcanics and Olympic Dam breccia     |
|        |          | 2      | Western Channel Diabase sills and Wernecke breccia |
|        |          | 3      | Breven-Hällefors dikes and Rapakivi intrusion      |
| Green  | Ca. 1.3  | 1      | Derim Derim sills and Galiwinku dikes              |
|        |          | 2      | Yanliao sills                                      |
|        |          | 3      | Datong dikes                                       |
| Orange | Ca. 1.38 | 1      | Midsommer sills                                    |
|        |          | 2      | Chieress dike                                      |
|        |          | 3      | Victoria Land sills                                |
|        |          | 4      | Hart River sills                                   |
|        |          | 5      | Mashak volcanics                                   |
| Brown  | Ca. 1.35 | 1      | Listvyanka dike                                    |
|        |          | 2      | Barking Dog event, Wellington Inlier               |
| Red    | Ca. 1.26 | 1      | Mackenzie dykes                                    |
|        |          | 2      | Nauyat volcanics                                   |
|        |          | 3      | Savage Point sills                                 |
|        |          | 4      | Harp dikes                                         |
|        |          | 5      | Lower Gardar dikes/sills                           |
|        |          | 6      | Bear River dikes                                   |
|        |          | 7      | Central Scandinavian dolerite complex              |
|        |          | 8      | Srednecheremshanskii dike                          |

For more information and additional references please refer to Ernst and Buchan (2001) and the webpage of the “Large Igneous Provinces Commission”: <http://www.largeigneousprovinces.org>.

**Table S7. Euler parameters for paleogeography reconstruction in Figure 3 at ~1.3 Ga.**

| Craton/block/terrane*                    | Euler Pole |       | Angle (°) | Reference/Source              |
|------------------------------------------|------------|-------|-----------|-------------------------------|
|                                          | (°N)       | (°E)  |           |                               |
| Laurentia                                | 12.0       | 135.0 | +91.0     | This study                    |
| WAC/SAC to NAC                           | -20.0      | 135.0 | +40.0     | Li and Evans (2011)           |
| Mawson to SAC                            | 1.3        | 37.7  | 30.3      | Collins and Pisarevsky (2005) |
| South-East Siberia to North-West Siberia | 60.0       | 115.0 | +25.0     | Evans (2009)                  |
| NAC to Laurentia                         | 37.8       | 90.2  | +102.7    | (Kirscher et al., 2019)       |
| NCC to Laurentia                         | 36.9       | 14.6  | +38.2     | This study                    |
| Baltica to Laurentia                     | 47.5       | 1.5   | +49.0     | Evans and Pisarevsky (2008)   |
| Siberia to Laurentia                     | 78.0       | 99.0  | +147.0    | Evans and Mitchell (2011)     |
| Greenland to Laurentia                   | 67.5       | 241.5 | -13.8     | Roest and Srivastava (1989)   |

\* Rotation relative to absolute framework unless otherwise stated

## REFERENCES

- Abbott, S. T., Sweet, I. P., Plumb, K. A., Young, D. N., Cutovinos, A., Ferenczi, P. A., and Pietsch, B. A., 2001, Roper Region: Urapunga and Roper River Special, Northern Territory: 1:250 000 geological map series explanatory notes, SD 53-10, 11 (second ed.), Northern Territory Geological Survey and Geoscience Australia (National Geoscience Mapping Accord).
- Abrahamsen, N., and Vandervoo, R., 1987, Paleomagnetism of Middle Proterozoic (C1.25Ga) Dykes from Central North Greenland: *Geophysical Journal of the Royal Astronomical Society*, v. 91, no. 3, p. 597-611.
- Buchan, K. L., Mertanen, S., Park, R. G., Pesonen, L. J., Elming, S., Abrahamsen, N., and Bylund, G., 2000, Comparing the drift of Laurentia and Baltica in the Proterozoic: the importance of key palaeomagnetic poles: *Tectonophysics*, v. 319, p. 167-198.
- Chamalaun, F. H., and Dempsey, C. E., 1978, Palaeomagnetism of the Gawler Range Volcanics and implications for the genesis of the Middleback hematite orebodies: *Journal of the Geological Society of Australia*, v. 25, p. 255-265.
- Chen, L. W., Huang, B. C., Yi, Z. Y., Zhao, J., and Yan, Y. G., 2013, Paleomagnetism of ca. 1.35 Ga sills in northern North China Craton and implications for paleogeographic reconstruction of the Mesoproterozoic supercontinent: *Precambrian Research*, v. 228, p. 36-47.
- Collins, A. S., and Pisarevsky, S. A., 2005, Amalgamating eastern Gondwana: The evolution of the Circum-Indian Orogens: *Earth-Science Reviews*, v. 71, no. 3-4, p. 229-270.
- Deenen, M. H. L., Langereis, C. G., van Hinsbergen, D. J. J., and Biggin, A. J., 2011, Geomagnetic secular variation and the statistics of palaeomagnetic directions: *Geophysical Journal International*, v. 186, no. 2, p. 509-520.
- Ding, J., Zhang, S., Zhao, H., Xian, H., Li, H., Yang, T., Wu, H., and Wang, W., 2020, A combined geochronological and paleomagnetic study on ~1220 Ma mafic dikes in the North China Craton and the implications for the breakup of Nuna and assembly of Rodinia: *American Journal of Science*, v. 320, no. 2, p. 125-149.
- Dunlop, D. J., 2002, Theory and application of the Day plot ( $M_{rs}/M_s$  versus  $H_{cr}/H_c$ ) 1. Theoretical curves and tests using titanomagnetite data: *Journal of Geophysical Research-Solid Earth*, v. 107, no. B3.

- Ernst, R. E., and Buchan, K. L., 2001, Large mafic magmatic events through time and links to mantle plume heads: *Mantle Plumes: Their Identification through Time*, no. 352, p. 483-575.
- Evans, D. A. D., 2009, The palaeomagnetically viable, long-lived and all-inclusive Rodinia supercontinent reconstruction: *Ancient Orogens and Modern Analogues*, v. 327, p. 371-404.
- Evans, D. A. D., and Mitchell, R. N., 2011, Assembly and breakup of the core of Paleoproterozoic-Mesoproterozoic supercontinent Nuna: *Geology*, v. 39, p. 443-446.
- Evans, D. A. D., and Pisarevsky, S. A., 2008, Plate tectonics on early Earth? Weighing the paleomagnetic evidence: *When Did Plate Tectonics Begin on Planet Earth*, v. 440, p. 249-263.
- Evans, M. E., and Bingham, D. K., 1973, Paleomagnetism of Precambrian Martin Formation, Saskatchewan: *Canadian Journal of Earth Sciences*, v. 10, no. 10, p. 1485-1493.
- Fisher, R., 1953, Dispersion on a sphere: *Proceedings of the Royal Society of London Series A: Mathematical, Physical and Engineering Sciences*, v. 217, p. 295-305.
- Halls, H. C., Hamilton, M. A., and Denyszyn, S. W., 2011, The Melville Bugt Dyke Swarm of Greenland: A Connection to the 1.5-1.6 Ga Fennoscandian Rapakivi Granite Province?, *in* Srivastava, R. K., ed., *Dyke Swarms: Keys for Geodynamic Interpretation: Keys for Geodynamic Interpretation*: Berlin, Heidelberg, Springer Berlin Heidelberg, p. 509-535.
- Halls, H. C., Li, J. H., Davis, D., Hou, G., Zhang, B. X., and Qian, X. L., 2000, A precisely dated Proterozoic palaeomagnetic pole from the North China craton, and its relevance to palaeocontinental reconstruction: *Geophysical Journal International*, v. 143, no. 1, p. 185-203.
- Idnurm, M., 2000, Towards a high resolution Late Palaeoproterozoic-earliest Mesoproterozoic apparent polar wander path for northern Australia: *Australian Journal of Earth Sciences*, v. 47, p. 405-429.
- Idnurm, M., Giddings, J. W., and Plumb, K. A., 1995, Apparent polar wander and reversal stratigraphy of the Palaeo-Mesoproterozoic southeastern McArthur basin, Australia: *Precambrian Research*, v. 72, p. 1-41.



- Irving, E., Baker, J., Hamilton, M., and Wynne, P. J., 2004, Early Proterozoic geomagnetic field in western Laurentia: implications for paleolatitudes, local rotations and stratigraphy: *Precambrian Research*, v. 129, no. 3-4, p. 251-270.
- Irving, E., Park, J. K., and Donaldson, J. A., 1972, Paleomagnetism of Western Channel Diabase and Associated Rocks, Northwest Territories: *Canadian Journal of Earth Sciences*, v. 9, no. 8, p. 960-+.
- Kirscher, U., Liu, Y., Li, Z. X., Mitchell, R. N., Pisarevsky, S. A., Denyszyn, S. W., and Nordsvan, A., 2019, Paleomagnetism of the Hart Dolerite (Kimberley, Western Australia) - A two-stage assembly of the supercontinent Nuna?: *Precambrian Research*, v. 329, p. 170-181.
- Kirschvink, J. L., 1980, The Least-Squares Line and Plane and the Analysis of Paleomagnetic Data: *Geophysical Journal of the Royal Astronomical Society*, v. 62, no. 3, p. 699-718.
- Kirschvink, J. L., Kopp, R. E., Raub, T. D., Baumgartner, C. T., and Holt, J. W., 2008, Rapid, precise, and high-sensitivity acquisition of paleomagnetic and rock-magnetic data: Development of a low-noise automatic sample changing system for superconducting rock magnetometers: *Geochemistry Geophysics Geosystems*, v. 9.
- Li, Z. X., and Evans, D. A. D., 2011, Late Neoproterozoic 40 degrees intraplate rotation within Australia allows for a tighter-fitting and longer-lasting Rodinia: *Geology*, v. 39, no. 1, p. 39-42.
- Liu, Y., Li, Z. X., Pisarevsky, S., Kirscher, U., Mitchell, R. N., and Stark, J. C., 2018, Palaeomagnetism of the 1.89 Ga Boonadgin dykes of the Yilgarn Craton: Possible connection with India: *Precambrian Research*.
- Lowrie, W., 1990, Identification of Ferromagnetic Minerals in a Rock by Coercivity and Unblocking Temperature Properties: *Geophysical Research Letters*, v. 17, no. 2, p. 159-162.
- Marcussen, C., and Abrahamsen, N., 1983, Paleomagnetism of the Proterozoic Zig-Zag Dal Basalt and the Midsommers0 Dolerites, Eastern North Greenland: *Geophysical Journal of the Royal Astronomical Society*, v. 73, no. 2, p. 367-387.
- Mcfadden, P. L., and McElhinny, M. W., 1988, The Combined Analysis of Remagnetization Circles and Direct Observations in Paleomagnetism: *Earth and Planetary Science Letters*, v. 87, no. 1-2, p. 161-172.

- Mcfadden and McElhinny, 1990, Classification of the Reversal Test in Paleomagnetism: *Geophysical Journal International*, v. 103, no. 3, p. 725-729.
- McGlynn, J. C., Hanson, G. N., Irving, E., and Park, J. K., 1974, Paleomagnetism and Age of Nonacho-Group Sandstones and Associated Sparrow Dikes, District of Mackenzie: *Canadian Journal of Earth Sciences*, v. 11, no. 1, p. 30-42.
- Meert, J. G., and Stuckey, W., 2002, Revisiting the paleomagnetism of the 1.476 Ga St. Francois mountains igneous province, Missouri: *Tectonics*, v. 21, no. 2.
- Murthy, G. S., 1978, Paleomagnetic results from the Nain anorthosite and their tectonic implications: *Canadian Journal of Earth Sciences*, v. 15, p. 516-525.
- Park, J. K., Irving, E., and Donaldson, J., 1973, Paleomagnetism of Precambrian Dubawnt Group: *Geological Society of America Bulletin*, v. 84, no. 3, p. 859-870.
- Pei, J. L., Yang, Z. Y., and Zhao, Y., 2006, A Mesoproterozoic paleomagnetic pole from the Yangzhuang Formation, North China and its tectonic implications: *Precambrian Research*, v. 151, no. 1-2, p. 1-13.
- Pisarevsky, S. A., Wingate, M. T. D., Li, Z. X., Wang, X. C., Tohver, E., and Kirkland, C. L., 2014, Age and paleomagnetism of the 1210 Ma Gnowangerup-Fraser dyke swarm, Western Australia, and implications for late Mesoproterozoic paleogeography: *Precambrian Research*, v. 246, p. 1-15.
- Roest, W. R., and Srivastava, S. P., 1989, Sea-Floor Spreading in the Labrador Sea - a New Reconstruction: *Geology*, v. 17, no. 11, p. 1000-1003.
- Schmidt, P. W., 1993, Paleomagnetic Cleaning Strategies: *Physics of the Earth and Planetary Interiors*, v. 76, no. 1-2, p. 169-178.
- Schmidt, P. W., and Williams, G. E., 2011, Paleomagnetism of the Pandurra Formation and Blue Range Beds, Gawler Craton, South Australia, and the Australian Mesoproterozoic apparent polar wander path: *Australian Journal of Earth Sciences*, v. 58, no. 4, p. 347-360.
- Symons, D. T. A., Symons, T. B., and Lewchuk, M. T., 2000, Paleomagnetism of the Deschambault Pegmatites: Stillstand and hairpin at the end of the Paleoproterozoic Trans-Hudson Orogeny,

- Canada: Physics and Chemistry of the Earth Part a-Solid Earth and Geodesy, v. 25, no. 5, p. 479-487.
- Tanaka, H., and Idnurm, M., 1994, Paleomagnetism of Proterozoic Mafic Intrusions and Host Rocks of the Mount Isa-Inlier, Australia - Revisited: *Precambrian Research*, v. 69, no. 1-4, p. 241-258.
- Van der Voo, R., 1990, The reliability of paleomagnetic data: *Tectonophysics*, v. 184, no. 1, p. 1-9.
- Veikkolainen, T., and Pesonen, L. J., 2014, Palaeosecular variation, field reversals and the stability of the geodynamo in the Precambrian: *Geophysical Journal International*, v. 199, no. 3, p. 1515-1526.
- Wang, C., Peng, P., Li, Z.-X., Pisarevsky, S., Denyszyn, S., Liu, Y., Gamal El Dien, H., and Su, X., 2020, The 1.24–1.21 Ga Licheng large igneous province in the North China Craton: Implications for paleogeographic reconstruction: *Journal of Geophysical Research: Solid Earth*, v. n/a, no. n/a, p. e2019JB019005.
- Wu, H., 2005, New Paleomagnetic Results from Mesoproterozoic Successions in Jixian Area, North China Block, and Their Implications for Paleocontinental Reconstructions [PhD: Chinese University of Geosciences, Beijing, 133 p.
- Wu, H. C., Zhang, S. H., Li, Z. X., Li, H. Y., and Dong, J., 2005, New paleomagnetic results from the Yangzhuang Formation of the Jixian System, North China, and tectonic implications: *Chinese Science Bulletin*, v. 50, no. 14, p. 1483-1489.
- Zhang, S., Li, Z. X., Evans, D. A. D., Wua, H., Li, H., and Dong, J., 2012, Pre-Rodinia supercontinent Nuna shaping up: A global synthesis with new paleomagnetic results from North China: *Earth and Planetary Science Letters*, v. 353-354, p. 145-155.
- Zijderveld, J. D. A., 1967, A. C. demagnetization of rocks: Analysis of results: in: Collinson, D.W., Creer, K.M., Runcorn, S.K. (Eds.), *Methods in Paleomagnetism*. Elsevier, Amsterdam, p. 254-286.
